# Supplementary material for: Frequency of circulating CD8+CD73+T cells is associated with survival in nivolumab-treated melanoma patients
Source: PubMed Central journal article supplement (PMC7065327; doi:10.1186/s12967-020-02285-0), 2020-03-11
Supplement: 12967_2020_2285_MOESM3_ESM.pdf [file 12967_2020_2285_MOESM3_ESM.pdf]

**Table S1 PFS according to the frequency of the reported cell populations**

|                               | <b>Cut-off<br/>(median frequency)</b> | <b>Median survival<br/>(months) (95%CI)</b> | <b>P value</b> |
|-------------------------------|---------------------------------------|---------------------------------------------|----------------|
| CD8+ lymphocytes              | <25.1%                                | 3.9 (0.8-7.0)                               | 0.24           |
|                               | >25.1%                                | 3.2 (1.1-5.3)                               |                |
| CD8+CD73+<br>lymphocytes      | <5.8%                                 | 3.9 (0-10.1)                                | 0.22           |
|                               | >5.8%                                 | 3.1 (0.9-5.3)                               |                |
| CD8+PD-1+<br>lymphocytes      | <9.8%                                 | 5.9 (0.4-11.4)                              | 0.02           |
|                               | >9.8%                                 | 2.6 (1.7-3.5)                               |                |
| CD8+PD-1+CD73+<br>lymphocytes | <2.3%                                 | 9.0 (0-19.9)                                | <0.0001        |
|                               | >2.3%                                 | 2.7 (2.1-3.3)                               |                |
